# Supplementary material for: The impact of different type 2 diabetes states stratified by baseline HbA1c on the periodontal outcomes of non-surgical periodontal treatment: a systematic review and network meta-analysis
Source: Research Square preprint supplement (doi:10.21203/rs.3.rs-2971227/v1), 2023-05-30
Supplement: Supplementary file 1 [file 495a80f72e5ff6baee5f0c73.docx]

# The impact of different type 2 diabetes states stratified by baseline HbA1c on the periodontal outcomes of non-surgical periodontal treatment: a systematic review and network meta-analysis.

**Appendix S1** Searching strategy

Searching strategy:

Disease: diabetes, periodontitis, periodontal disease

Intervention: periodontal treatment, non-surgical treatment, scaling and root planing

Outcomes: probing depth, bleeding on probing, clinical attachment level

**Pubmed:**

(((("Treatment Outcome"[Mesh]) OR ("Clinical Effectiveness"[tiab] OR "Clinical Efficacy"[tiab] OR "Treatment Effectiveness"[tiab] OR "Treatment Efficacy"[tiab] OR "Rehabilitation Outcome"[tiab] OR outcome*[tiab] OR micribiological[tiab] OR immunologic*[tiab] OR supragingival[tiab] OR periopathogenic[tiab] OR subgingival[tiab] OR "probing depth*" [tiab] OR "clinical attachment level"[tiab] OR "bleeding on probing"[tiab]))) AND (("Periodontal Diseases"[Mesh]) OR (periodont*[tiab] OR Furcation[tiab]OR Gingiv*[tiab]OR Pericement*[tiab] OR Granuloma*[tiab] Pericoronitis[tiab]OR Peri-Implantitis[tiab]OR Periapical[tiab]OR "Radicular Cyst"[tiab]OR "Alveolar Bone Loss"[tiab]OR "Tooth Loss"[tiab]OR "Tooth Migration"[tiab] OR "Tooth Mobility"[tiab]))) AND (("Diabetes Mellitus"[Mesh]) OR Diabet*[tiab] OR "Type 2 Diabetes Mellitus*" [tiab])

**Embase:**

#1 AND #2 AND #3

#1: 'diabetes mellitus'/exp OR 'diabetes mellitus':ab,ti OR 'type 2 diabetes mellitus':ab,ti

#2: 'periodontal disease'/exp OR 'periodont*':ab,ti OR 'furcation':ab,ti OR 'gingiv*':ab,ti OR 'pericement*':ab,ti OR 'granuloma* pericoronitis':ab,ti OR 'peri-implantitis':ab,ti OR 'periapical':ab,ti OR 'radicular cyst':ab,ti OR 'alveolar bone loss':ab,ti OR 'tooth loss':ab,ti OR 'tooth migration':ab,ti OR 'tooth mobility':ab,ti

#3: 'treatment outcome'/exp OR 'clinical effectiveness':ab,ti OR 'clinical efficacy':ab,ti OR 'treatment effectiveness':ab,ti OR 'treatment efficacy':ab,ti OR 'rehabilitation outcome':ab,ti OR 'outcome*':ab,ti OR 'micribiological':ab,ti OR 'immunologic*':ab,ti OR 'supragingival':ab,ti OR 'periopathogenic':ab,ti OR 'subgingival':ab,ti

**The Cochrane Central Register of Controlled Trails:**

(Diabetes OR Type 2 Diabetes Mellitus) AND (periodontal OR Furcation OR Gingiv* OR Pericement OR Granuloma Pericoronitis OR Peri-Implantitis OR Periapical OR "Radicular Cyst" OR "Alveolar Bone Loss" OR "Tooth Loss" OR "Tooth Migration" OR "Tooth Mobility")

**Appendix Table S1** Excluded studies and reasons for exclusion

| **Study** | **Reason for exclusion** |
| --- | --- |
| Sastrowijoto, 1990 | No control group |
| Tervonen, 1993 | Diabetes mellitus undifferentiated as type 1 or type 2 |
| Grossi, 1996 | No control group |
| Westfelt, 1996 | No clinical measurement data available (PD, BOP, CAL), (percentage only) |
| Tervonen, 1997 | Study includes only type 1 diabetes mellitus |
| Christgau, 1998 | Diabetes mellitus undifferentiated as type 1 or type 2 |
| Sbordone, 1998 | Patients in the control group did not have periodontitis |
| Taylor, 1998 | Patients were included without periodontal treatment |
| Kurtis, 1999 | Patients were included without periodontal treatment |
| Fu, 2000 | No control group |
| Rocha, 2001 | No control group |
| Sims, 2001 | No clinical measurement data available (PD, BOP, CAL), (graph only) |
| Orbak, 2002 | Patients were included without periodontal treatment |
| Yang, 2004 | No clinical measurement data available (PD, BOP, CAL), (percentage only) |
| Faria-Almeida, 2006 | No clinical measurement data available (PD, BOP, CAL), (graph only) |
| Sanchez, 2007 | It was not possible to tell if type 2 diabetes was well controlled |
| Duarte, 2007 | Patients were included without periodontal treatment |
| Lalla, 2007 | No control group |
| Madden, 2008 | No control group |
| Cruz, 2008 | It was not possible to tell if type 2 diabetes was well controlled |
| Correa, 2008 | No clinical measurement data available (PD, BOP, CAL) |
| Concalves, 2008 | It was not possible to tell if type 2 diabetes was well controlled |
| Javed, 2008 | Patients were included without periodontal treatment |
| Gumus, 2009 | Patients were included without periodontal treatment |
| Vergnes, 2009 | No control group |
| Matsumoto, 2009 | No clinical measurement data available (PD, BOP, CAL) |
| Wu, 2009 | Patients were included without periodontal treatment |
| Bandyopadhyay, 2010 | It was not possible to tell if type 2 diabetes was well controlled |
| Correa, 2010 | No control group |
| Deo, 2010 | No control group |
| Costa, 2010 | Patients were included without periodontal treatment |
| Wei, 2011 | It was not possible to tell if type 2 diabetes was well controlled |
| Lin, 2011 | No control group |
| Koromantzos, 2011 | No control group |
| Chen, 2012 | No control group |
| Macedo, 2012 | No control group |
| Moeintaghavi, 2012 | No control group |
| Obradovic, 2012 | It was not possible to tell if type 2 diabetes was well controlled |
| Serrano, 2012 | Patients were included without periodontal treatment |
| Camargo, 2013 | It was not possible to tell if type 2 diabetes was well controlled |
| Aemaimanan, 2013 | Patients were included without periodontal treatment |
| Kranthi, 2013 | Patients were included without periodontal treatment |
| Casarin, 2013 | Patients were included without periodontal treatment |
| Costa, 2013 | Patients were included without periodontal treatment |
| Yuan, 2013 | No control group |
| Michalowicz, 2014 | No control group |
| Buzinin, 2014 | No clinical measurement data available (PD, BOP, CAL), (percentage only) |
| Lopez, 2014 | No clinical measurement data available (PD, BOP, CAL), (graph only) |
| Longo, 2014 | It was not possible to tell if type 2 diabetes was well controlled |
| Miranda, 2014 | No control group |
| Javed, 2014 | No control group |
| Tsalikis, 2014 | No control group |
| Raman, 2014 | No control group |
| Evangelista, 2015 | No control group |
| Ramos, 2015 | No control group |
| Kara, 2015 | It was not possible to tell if type 2 diabetes was well controlled |
| Yilmaz, 2015 | Patients were included without periodontal treatment |
| Alshehri, 2015 | No control group |
| Javed, 2015 | Patients were included without periodontal treatment |
| Ghallab, 2015 | Patients were included without periodontal treatment |
| Kenneth, 2016 | No control group |
| Santos, 2016 | No control group |
| Kocak, 2016 | No control group |
| Kumari, 2016 | No control group |
| Mammen, 2016 | No control group |
| Geisinger, 2016 | No control group |
| Altamash, 2016 | It was not possible to tell if type 2 diabetes was well controlled |
| Demirturk-Gocgun, 2016 | No control group |
| Abduljabbar, 2017 | No control group |
| Wang, 2017 | No control group |
| Mizuno, 2017 | No control group |
| Patnaik, 2017 | Patients were included without periodontal treatment |
| Al Zahrani, 2018 | No clinical measurement data available (PD, BOP, CAL) |
| Le, 2018 | No control group |
| Alasqah, 2018 | Patients were included without periodontal treatment |
| Li, 2018 | Patients were included without periodontal treatment |
| Vergnes, 2018 | Both type 1 and type 2 diabetes mellitus were included |
| Kocher, 2018 | Diabetes mellitus undifferentiated as type 1 or type 2 |
| Cortelli, 2018 | No clinical measurement data available (PD, BOP, CAL) |
| Quintero, 2018 | No control group |
| Barbosa, 2018 | No control group |
| Bazyar, 2018 | No control group |
| Tsobgny-Tsague, 2018 | No control group |
| Abhaya, 2019 | No control group |
| Ivanaga, 2019 | No control group |
| Mourao, 2019 | No control group |
| Kocak, 2019 | No clinical measurement data available (PD, BOP, CAL) |
| ÖZBERK, 2019 | No control group |
| Nishioka, 2019 | Diabetes mellitus undifferentiated as type 1 or type 2 |
| Mirza, 2019 | No control group |
| Montero, 2020 | Diabetes mellitus undifferentiated as type 1 or type 2 |
| El-Makaky, 2020 | No control group |
| Feng, 2021 | No control group |
| Claudio, 2021 | No control group |
| Qureshi, 2021 | Both type 1 and type 2 diabetes mellitus were included |
| Tran, 2021 | No control group |
| Anton, 2021 | No control group |
| Sanjeeta, 2022 | Both type 1 and type 2 diabetes mellitus were included |
| Graziani, 2022 | No control group |
| Pham, 2022 | No control group |
| Pulivarthi, 2022 | Well controlled type 2 diabetes mellitus criteria were not stated |
| Bazyar, 2022 | No control group |
| Komatsu, 2022 | No control group |
| Milanesi, 2022 | Diabetes mellitus undifferentiated as type 1 or type 2 |

**Appendix Table S2** Datebase of the selected studies

| **Study, year** | **Comparison (N, patients)** | **Probing depth reduction (mm)** | | | **Blooding on probing reduction (%)** | | | **clinical attachment level gain (mm)** | | |
| --- | --- | --- | --- | --- | --- | --- | --- | --- | --- | --- |
| No-DM | WC-T2DM | PC-T2DM | No-DM | WC-T2DM | PC-T2DM | No-DM | WC-T2DM | PC-T2DM |
| Santos, 2009 | WC-T2DM (15) vs.  PC-T2DM (21) | NA | 0.7±0.5 | 0.7±0.6 | NA | 45.5±26.4 | 47.5±28.9 | NA | 0.7±0.8 | 0.7±0.8 |
| Dag, 2009 | No-DM (15)  vs.  WC-T2DM (15) vs.  PC-T2DM (15) | 0.25±0.59 | 0.37±0.44 | 0.47±0.59 | 34±17 | 24±12 | 29±17 | 1.40±0.58 | 1.22±0.81 | 1.26±0.90 |
| Kardesler, 2010 | No-DM (15)  vs.  WC-T2DM (13) vs.  PC-T2DM (12) | 1.2±0.5 | 0.9±0.4 | 1.0±0.9 | 50.7±14.3 | 56.1±7.5 | 45.4±10.8 | 0.4±0.7 | 0.4±0.9 | 0.2±1.0 |
| Cirano, 2012 | No-DM (15)  vs.  PC-T2DM (16) | 2.7±0.4 | NA | 2.3±0.4 | NA | NA | NA | 2.1±0.8 | NA | 2.1±0.8 |
| Mirnic, 2013 | No-DM (21)  vs.  WC-T2DM (18) vs.  PC-T2DM (23) | 0.35±0.23 | 0.11±0.16 | 0.11±0.29 | NA | NA | NA | 0.43±0.41 | 0.24±0.19 | 0.27±0.27 |
| Silva-Boghossian , 2014 | No-DM (20)  vs.  PC-T2DM (20) | 1.2±0.5 | NA | 1.5±0.8 | 60.3±14.2 | NA | 62.7±13.9 | 0.4±0.9 | NA | 0.6±1.4 |
| Kaur, 2015 | No-DM (25)  vs.  WC-T2DM (23) vs.  PC-T2DM (27) | 00.86±0.29 | 0.84±0.31 | 0.79±0.26 | 41.48±15.27 | 31.85±9.56 | 30.11±12.54 | 0.73±0.31 | 0.72±0.34 | 0.71±0.38 |
| Rabelo, 2020 | No-DM (15)  vs.  WC-T2DM (15) vs.  PC-T2DM (15) | 0.8±0.3 | 0.9±0.4 | 1.0±0.4 | 61.5±14.3 | 58.5±9.1 | 59.7±10.3 | 0.6±0.3 | 0.5±0.3 | 0.6±0.4 |
| Mohammed, 2021 | No-DM (17)  vs.  WC-T2DM (17) vs.  PC-T2DM (16) | 1.49±0.60 | 1.55±0.84 | 1.39±0.85 | 28.3±7.4 | 25.3±20.0 | 32.1±25.8 | 1.69±0.51 | 1.58±0.88 | 1.44±0.76 |
| Mohammed, 2021* | No-DM (17)  vs.  WC-T2DM (17) vs.  PC-T2DM (16) | 2.89±0.42 | 2.75±0.78 | 2.00±0.79 | 34.1±19.6 | 34.2±19.3 | 40.1±24.2 | 2.65±0.98 | 2.55±0.64 | 2.06±0.86 |
| Mirnic, 2022 | No-DM (31)  vs.  WC-T2DM (29) vs.  PC-T2DM (32) | 0.34±0.23 | 0.11±0.16 | 0.08±0.27 | NA | NA | NA | 0.34±0.3 | 0.24±0.24 | 0.23±0.27 |

**Appendix Table S3** Quality assessment of the selected prospective cohort studies

| **Study** | **Selection** | | | | **Comparability** | **Outcome** | | | **Total** |
| --- | --- | --- | --- | --- | --- | --- | --- | --- | --- |
| Representativeness of the exposed cohort(Maximum:⭐) | Selection of the non-exposed cohort(Maximum:⭐) | Ascertainment of exposure(Maximum: ⭐) | Demonstration that outcome of interest was not present at start of study(Maximum: ⭐) | Comparability of cohorts on the basis of the design or analysis(Maximum: ⭐⭐) | Assessment of outcome(Maximum: ⭐) | Was follow-up long enough for outcomes to occur(Maximum:⭐) | Adequacy of follow up of cohorts (Maximum:⭐) |
| Santos, 2009 | ⭐ | ⭐ | ⭐ | ⭐ | ⭐⭐ | ⭐ | ⭐ | ⭐ | 9⭐ |
| Dag, 2009 | ⭐ | ⭐ | ⭐ | ⭐ | ⭐ | ⭐ | ⭐ | ⭐ | 8⭐ |
| Kardesler, 2010 | ⭐ | ⭐ | ⭐ | ⭐ | ⭐ | ⭐ | ⭐ | ⭐ | 8⭐ |
| Cirano, 2012 | ⭐ | ⭐ | ⭐ | ⭐ | ⭐ | ⭐ | ⭐ | ⭐ | 8⭐ |
| Mirnic, 2013 | ⭐ | ⭐ | ⭐ | ⭐ | - | ⭐ | ⭐ | ⭐ | 7⭐ |
| Silva-Boghossian, 2014 | - | - | ⭐ | ⭐ | ⭐ | ⭐ | ⭐ | ⭐ | 6⭐ |
| Kaur, 2015 | - | - | ⭐ | ⭐ | ⭐⭐ | ⭐ | ⭐ | ⭐ | 7⭐ |
| Rabelo, 2020 | ⭐ | ⭐ | ⭐ | ⭐ | ⭐ | ⭐ | ⭐ | ⭐ | 8⭐ |
| Mohammed, 2021 | - | - | ⭐ | ⭐ | ⭐⭐ | ⭐ | ⭐ | ⭐ | 7⭐ |
| Mirnic, 2022 | - | - | ⭐ | ⭐ | ⭐⭐ | - | ⭐ | ⭐ | 6⭐ |

**
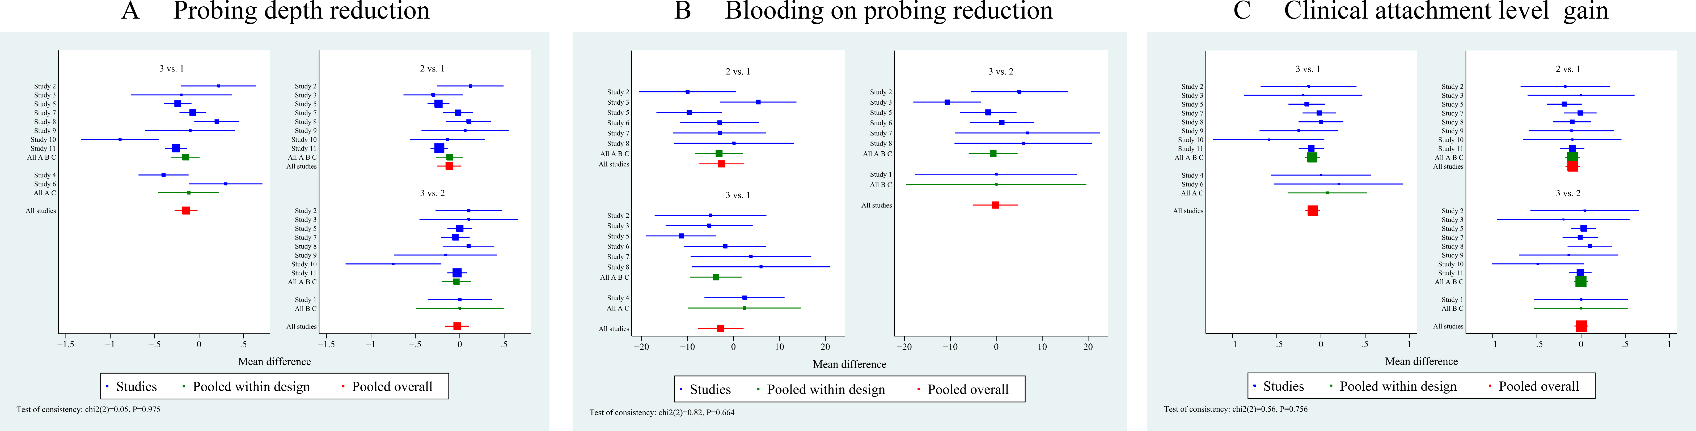
**

**Appendix** **Figure S1** The global inconsistency test

**Appendix Table S4** Local inconsistency of this network meta-analysis

| **Outcome** | **Side** | **Direct coefficient** | **Standard error** | **Indirect coefficient** | **Standard error** | **Difference coefficient** | **Standard error** | **P value** | **τ** |
| --- | --- | --- | --- | --- | --- | --- | --- | --- | --- |
| PD | No-DM vs. WC-T2DM | -0.0859492 | 0.092236 | -0.092887 | 0.307887 | 0.0069378 | 0.3203104 | 0.983 | 0.1907427 |
| No-DM vs. PC-T2DM | -0.1256616 | 0.0848352 | -0.0423245 | 0.5541492 | -0.0833371 | 0.5621136 | 0.882 | 0.1903316 |
| WC-T2DM vs. PC-T2DM | -0.0390619 | 0.0929264 | -0.0046821 | 0.4043642 | -0.0343798 | 0.4180113 | 0.934 | 0.1922961 |
| BOP | No-DM vs. WC-T2DM | -3.095238 | 2.609817 | 5.054208 | 10.72416 | -8.149446 | 11.06042 | 0.461 | 4.282567 |
| No-DM vs. PC-T2DM | -2.758054 | 2.600673 | -2.480174 | 20.53866 | -0.2778805 | 20.71589 | 0.989 | 4.42934 |
| WC-T2DM vs. PC-T2DM | -0.621499 | 2.565441 | 11.78574 | 13.10878 | -12.46789 | 13.43987 | 0.354 | 4.206181 |
| CAL | No-DM vs. WC-T2DM | -0.0851252 | 0.0521694 | 0.0926135 | 0.3485364 | -0.1777388 | 0.3526756 | 0.614 | 2.7e-10 |
| No-DM vs. PC-T2DM | -0.053509 | -0.1094965 | -0.1094965 | 0.5476516 | 0.0559875 | 0.5500116 | 0.919 | 2.11e-12 |
| WC-T2DM vs. PC-T2DM | 0.0235691 | 0.2964383 | 0.2964383 | 0.4649582 | -0.2728692 | 0.4683854 | 0.560 | 3.96e-10 |

| **Outcome** | **Loop** | **IF** | **seIF** | **Z value** | **P value** | **CI 95%** | **Loop heterogeneity(τ2)** |
| --- | --- | --- | --- | --- | --- | --- | --- |
| PD | No-DM——WC-T2DM—— PC-T2DM | 0.019 | 0.199 | 0.093 | 0.926 | （0.00, 0.41） | 0.018 |
| BOP | No-DM——WC-T2DM—— PC-T2DM | 6.567 | 7.011 | 0.937 | 0.349 | (0.00, 20.31) | 16.649 |
| CAL | No-DM——WC-T2DM—— PC-T2DM | 0.152 | 0.239 | 0.638 | 0.524 | (0.00, 0.62) | 0.000 |

**Appendix Table S5** Local inconsistency of this network meta-analysis


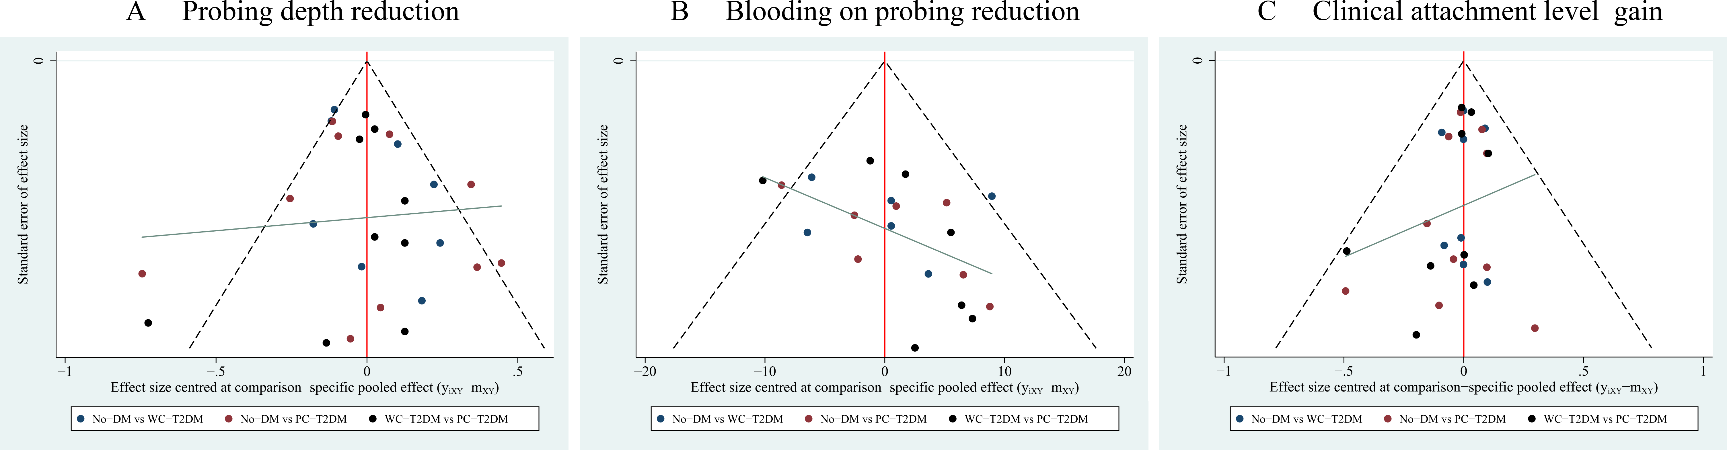


**Appendix Figure S2** Comparison-adjusted funnel plot for accuracy network. The red line represents the null hypothesis that independent effect size estimates do not differ from the comparison-specific pooled estimates. The purple line represents the distribution symmetry of the overall contrast.
